# Supplementary material for: Core–shell Ru/NiO x @graphene composite aerogels as efficient bifunctional electrocatalysts for overall water splitting
Source: Royal Society of Chemistry journal article supplement (doi:10.1039/d5qi00912j), 2025-01-01
Supplement: d5qi00912j1.pdf [file d5qi00912j1.pdf]

## **Supplementary information**

### **Core-Shell Ru/NiO<sub>x</sub>@graphene Composite Aerogel as efficient Bifunctional Electrocatalysts for Overall Water Splitting**

Jiangcheng Zhang, Hu Yao, Xiayu Wang, Xin Yu, Qiuhan Cao, Xiaoyi Dong, Xiaohui Guo\*

\*Key Lab of Synthetic and Natural Functional Molecule Chemistry of Ministry of Education, The College of Chemistry and Materials Science, Northwest University, Xi'an 710069, P. R. China.

\*Corresponding author e-mail: [guoxh2009@nwu.edu.cn](mailto:guoxh2009@nwu.edu.cn);

## **Experimental Procedure**

### **Chemicals.**

All reagents were used as purchased without further purification. Carbon paper (CP), Ruthenium chloride ( $\text{RuCl}_3 \cdot x\text{H}_2\text{O}$ ), Nickel chloride ( $\text{NiCl}_2 \cdot 6\text{H}_2\text{O}$ ), graphene oxide (GO), potassium hydroxide (KOH) and anhydrous ethanol ( $\text{C}_2\text{H}_6\text{O}$ ) were purchased from Aladdin's Reagent. were purchased from Aladdin reagent.

### **Characterization**

The morphology of different samples was characterized by scanning electron microscopy (SEM, SU-8010), and the morphology, structure and elemental composition and distribution of  $\text{Ru/NiO}_x@\text{GA}$  were analysed by transmission electron microscopy (TEM, Talos-200) and EDX mapping. The crystal structures of the different samples were characterised using a wide-angle X-ray powder diffractometer (XRD, Bruker D8 ADVANCE) ( $\text{Cu K}_\alpha$  radiation) at a scanning rate of  $0.05^\circ\text{s}^{-1}$ . Translated with DeepL.com (free version) The elemental composition and valence states of the samples were analysed by X-ray photoelectron spectroscopy (XPS, Thermo Scientific, ESCALAB Xi<sup>+</sup>) with an  $\text{Al K}_\alpha$  X-ray source.

### **Electrochemical measurements**

All electrochemical measurements were performed at an electrochemical

workstation (CHI 660E, Inc., Shanghai, China). The various properties of the electrocatalysts were measured by a three-electrode system in 1 M KOH solution. A standard Ag/AgCl electrode and a platinum sheet were used as reference and counter electrodes, respectively. The working electrode was a carbon paper loaded with the catalyst, which was prepared as follows: Firstly, 5 mg of the sample was dispersed into a mixed solution consisting of 50  $\mu\text{L}$  of Nafion (5 wt%) and 950  $\mu\text{L}$  of ethanol, which was ultrasonicated for 1 h to make a homogeneous mixture. Then, 30  $\mu\text{L}$  of the solution obtained in the previous step was added dropwise onto CP ( $1 \times 0.5 \text{ cm}^2$ ) and dried naturally. The catalyst loading on CP was about  $0.3 \text{ mg cm}^{-2}$ . The performances of HER and OER were measured in an electrolyte of 1.0 M KOH to evaluate their electrocatalytic activities. The reference electrode was converted to RHE according to the Nernst equation ( $E_{\text{RHE}} = E_{\text{Ag/AgCl}} + 0.0591 \text{pH} + E_{(\text{Ag/AgCl})}$ ).

### **Electrocatalytic performance testing**

The samples were firstly activated by cyclic voltammetry (CV) at a sweep rate of  $50 \text{ mV s}^{-1}$ , and secondly, the samples were determined by linear scanning voltammetry (LSV) (with a sweep rate of  $5 \text{ mV s}^{-1}$ ) at a  $10 \text{ mA cm}^{-2}$  current density of the overpotential. The electrochemical specific surface area (ECSA) of different catalysts was determined by the CV method at different scan rates from  $10$  to  $50 \text{ mV s}^{-1}$  and the corresponding double layer capacitance ( $C_{\text{dl}}$ ) values were calculated from the ECSA. Finally, cyclic stability tests were carried out under constant current conditions ( $10 \text{ mA cm}^{-2}$ ). The Electrochemical impedance spectroscopy (EIS) was measured over a

frequency range of 0.01~ 10<sup>6</sup> Hz.

### **Overall water splitting test**

The overall water splitting performance of the prepared catalyst was evaluated in a twoelectrode setup with the catalyst as both the anode and cathode. The carbon paper (1×0.5 cm<sup>-2</sup>) with catalyst loading of 0.3 mg cm<sup>-2</sup> was served as the working electrode. The polarization curves were recorded at a scan rate of 5 mV s<sup>-1</sup>. The voltage range was fixed at 1.0 to 2.0 V. The durability test was conducted at a constant current density at 10 mA cm<sup>-2</sup>. The performance of overall water splitting cells assembled by RuO<sub>2</sub>//Pt/C pair were also evaluated as reference.

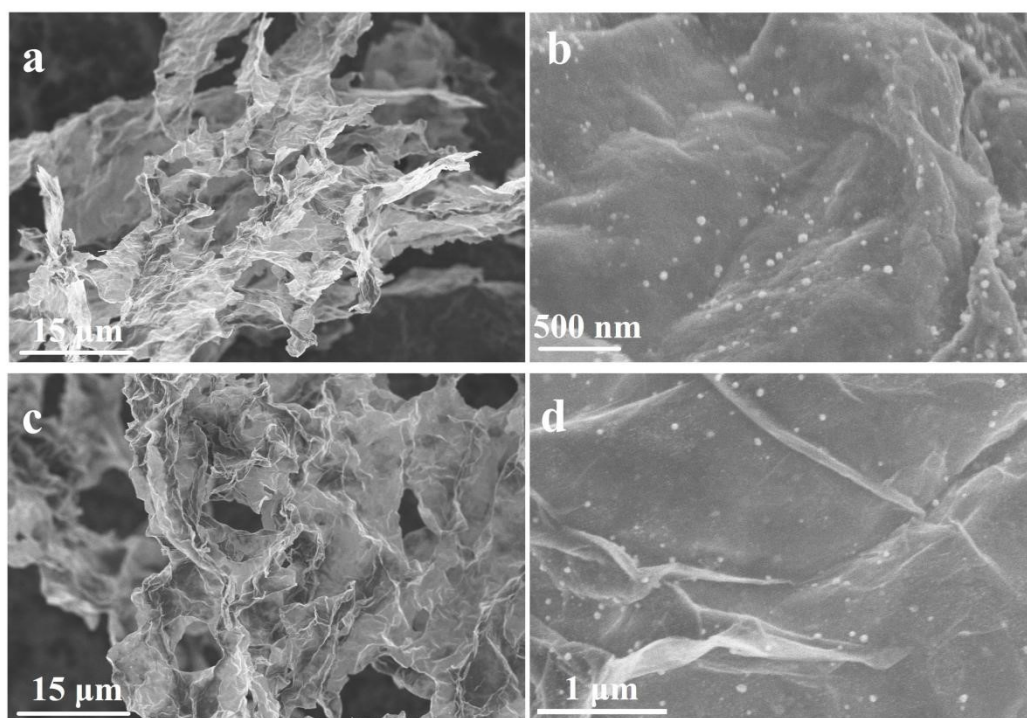

**Fig. S1.** SEM images of (a-b) Ru/NiO<sub>x</sub>@GA and (c-d) Ru/Ni@GA-H with different magnifications.

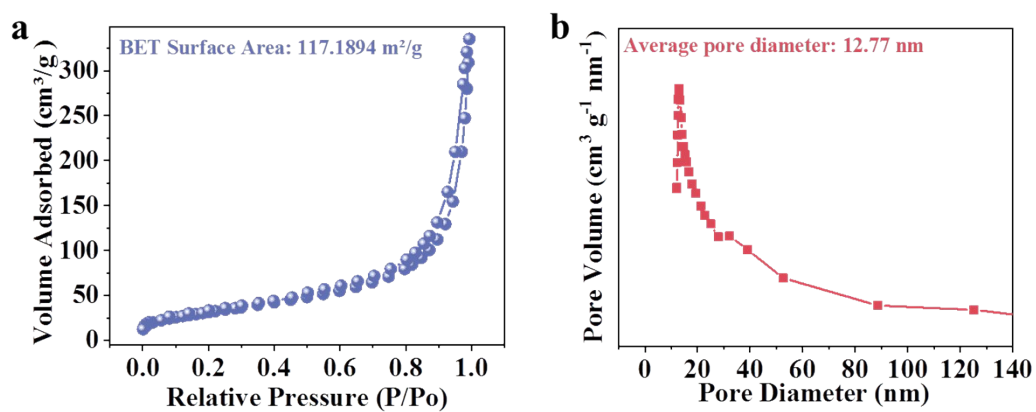

**Fig. S2.** (a) N<sub>2</sub> adsorption-desorption isotherms and (b) Pore size

distributions of the Ru/NiO<sub>x</sub>@GA.

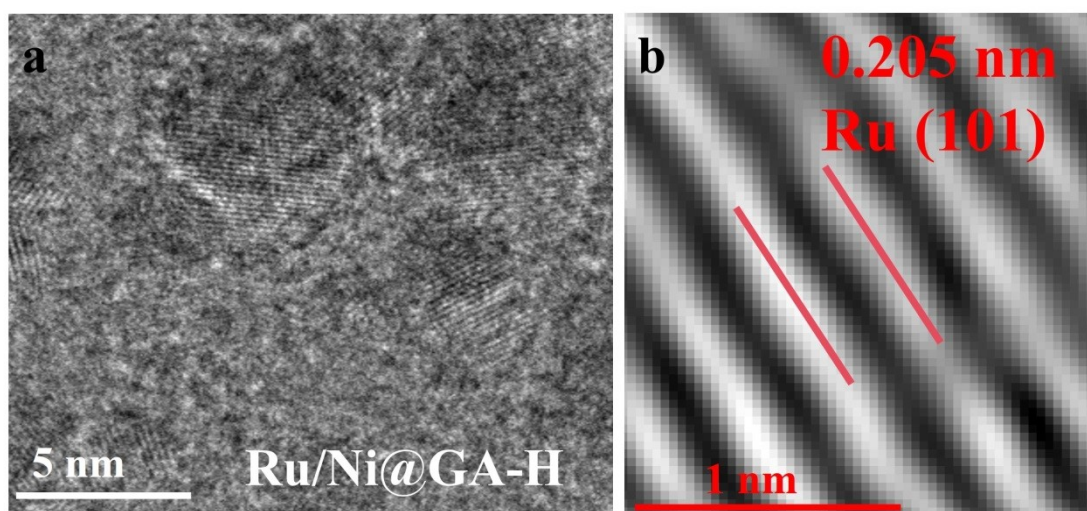

**Fig. S3.** (a-b) HRTEM and FFT image of Ru/Ni@GA-H.

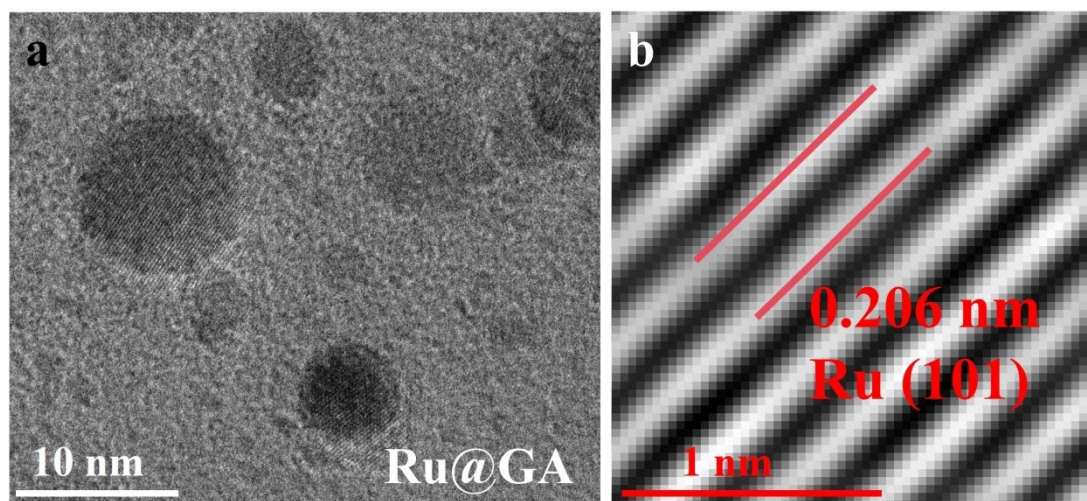

**Fig. S4.** (a-b) HRTEM and FFT image of Ru@GA.

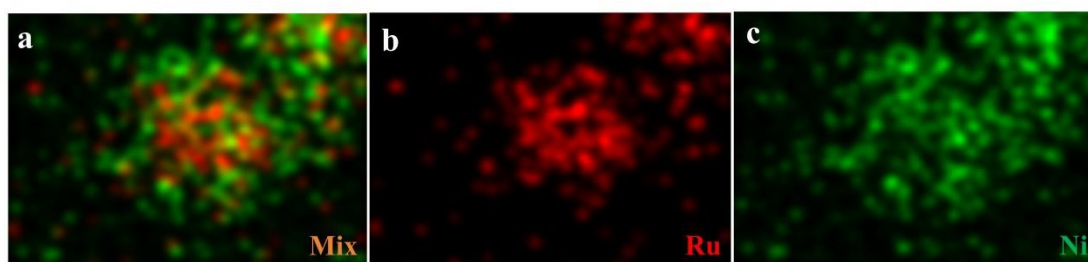

**Fig. S5.** EDX mapping of Ru/Ni@GA-H.



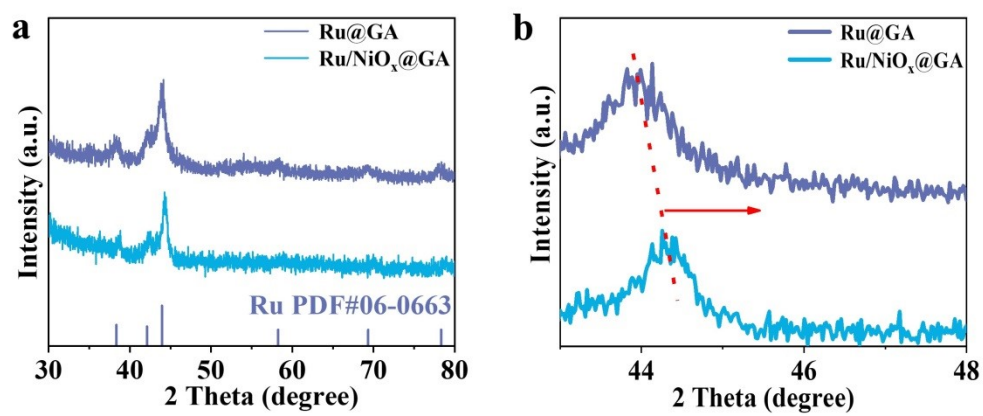

**Fig. S6.** (a-b) XRD patterns of Ru@GA and Ru/NiO<sub>x</sub>@GA.

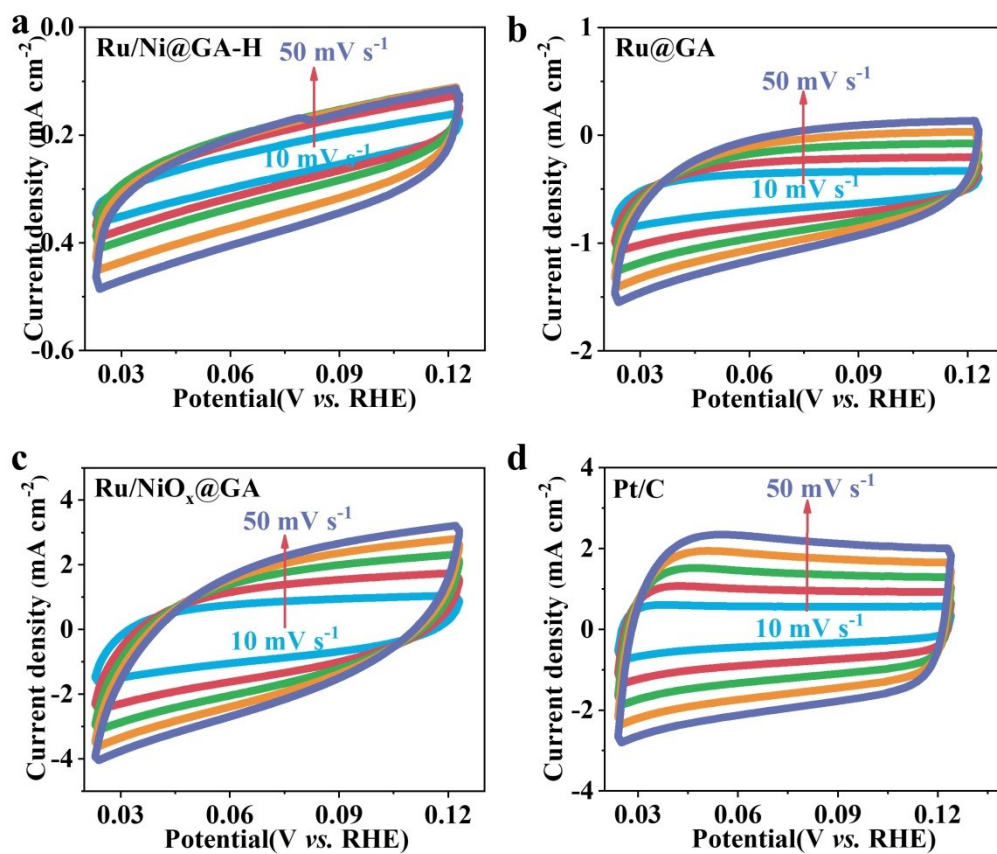

**Fig. S7.** cyclic voltammetry curves of (a) Ru/Ni@GA-H; (b) Ru@GA ; (c) Ru/NiO<sub>x</sub>@GA; (d)Pt/C at different sweep speeds.

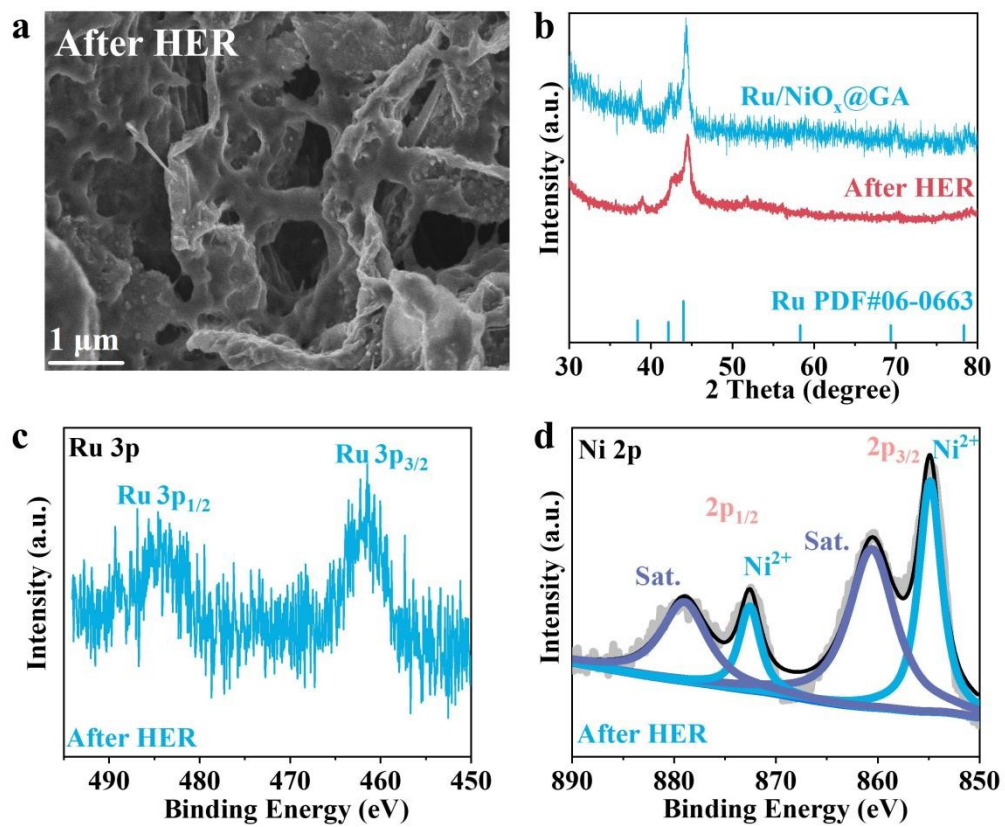

**Fig. S8.** (a)SEM image; (b) XRD pattern of Ru/NiO<sub>x</sub>@GA; (c) Ru 3p; (d) Ni 2p for Ru/NiO<sub>x</sub>@GA after 200h HER reaction.

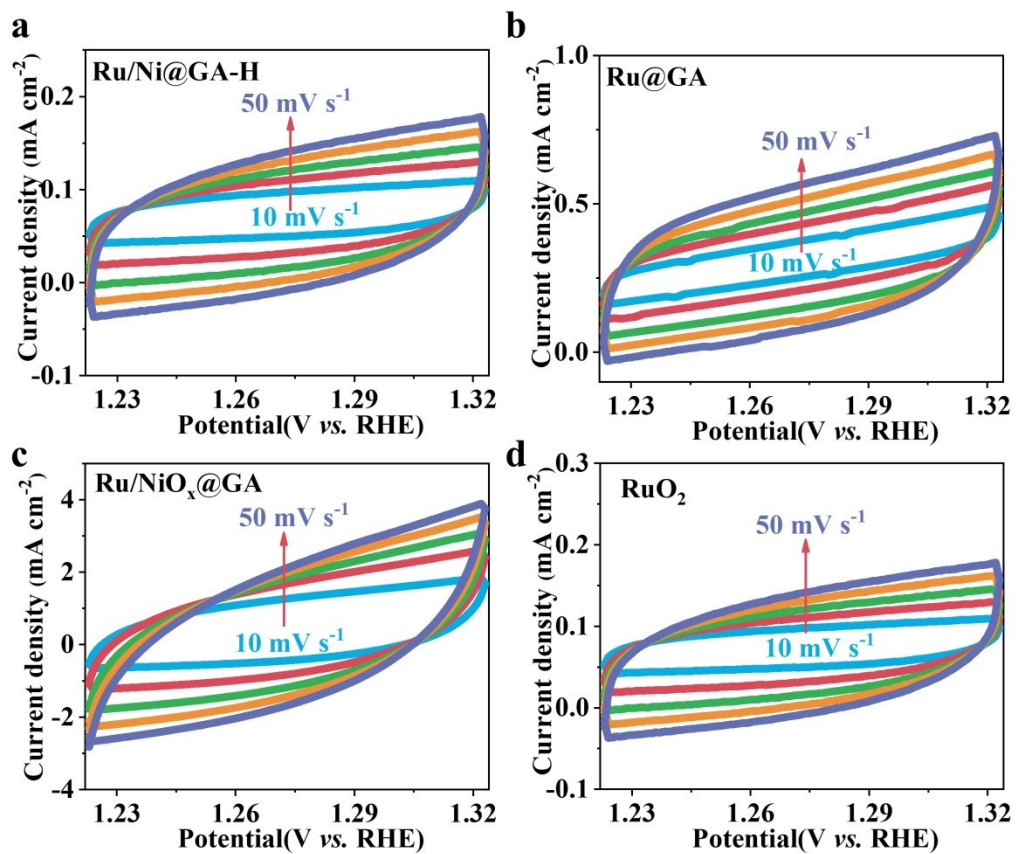

**Fig. S9.** OER cyclic voltammetry curves of (a) Ru/Ni@GA-H; (b) Ru@GA ; (c) Ru/NiO<sub>x</sub>@GA; (d) RuO<sub>2</sub> at different sweep speeds

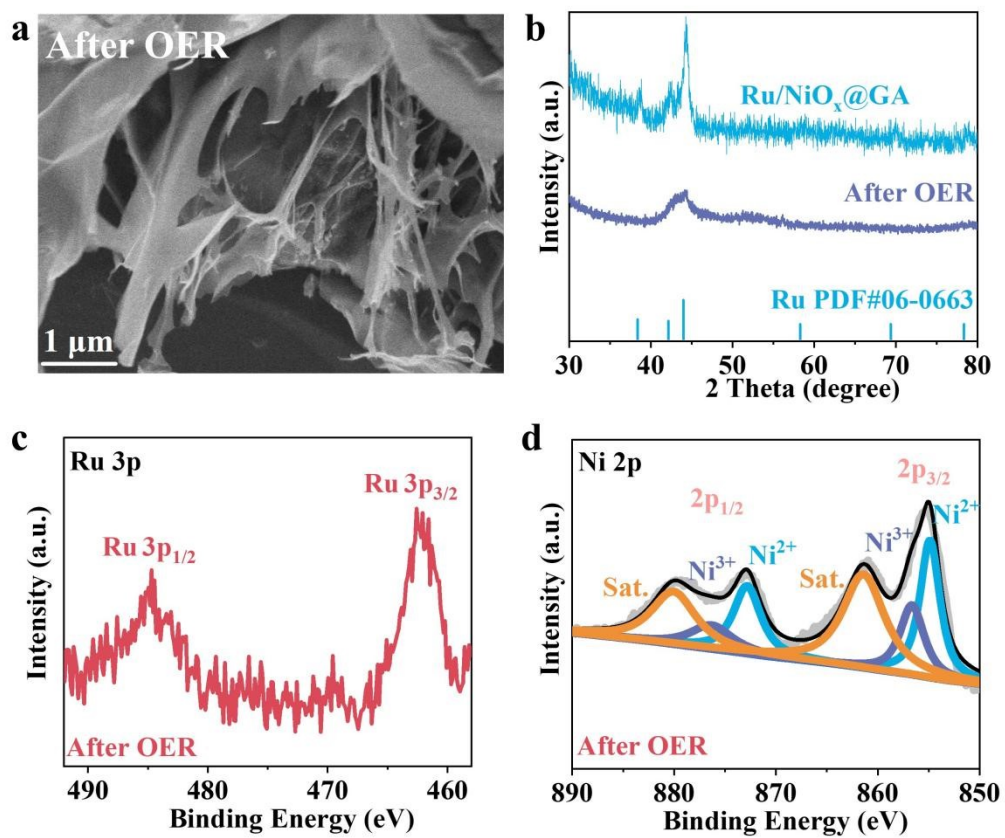

**Fig. S10.** (a) SEM image; (b) XRD pattern of Ru/NiO<sub>x</sub>@GA; (c) Ru 3p; (d) Ni 2p of Ru/NiO<sub>x</sub>@GA after 200h OER reaction.

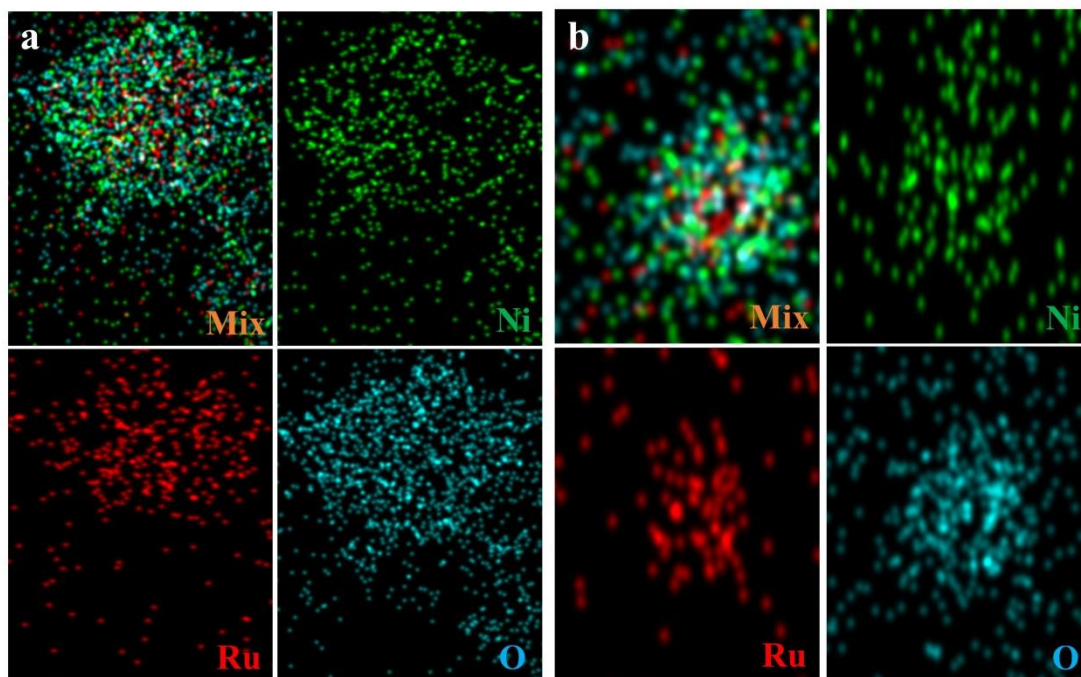

**Fig. S11** EDX mapping image after long-cycle testing for (a) HER and (b) OER.

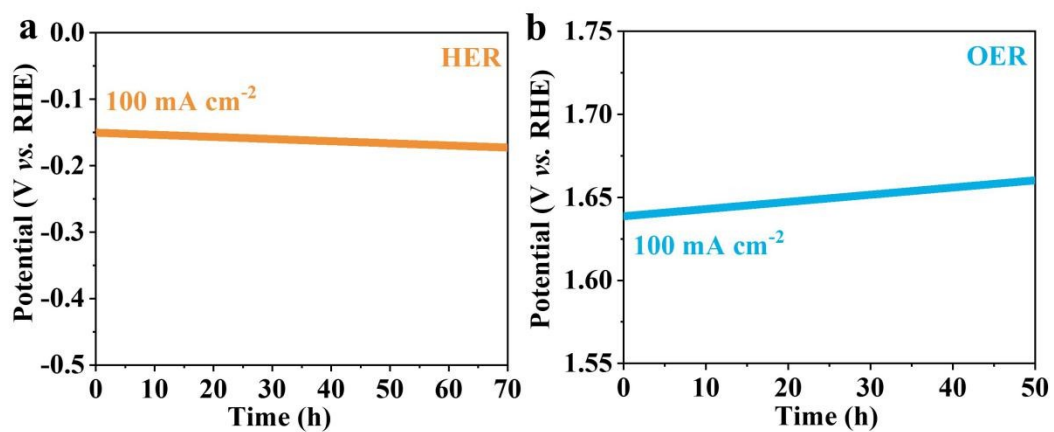

**Fig. S12** Ru/NiO<sub>x</sub>@GA at 100 mA cm<sup>-2</sup> current density cycling stability for (a) HER and (b) OER.

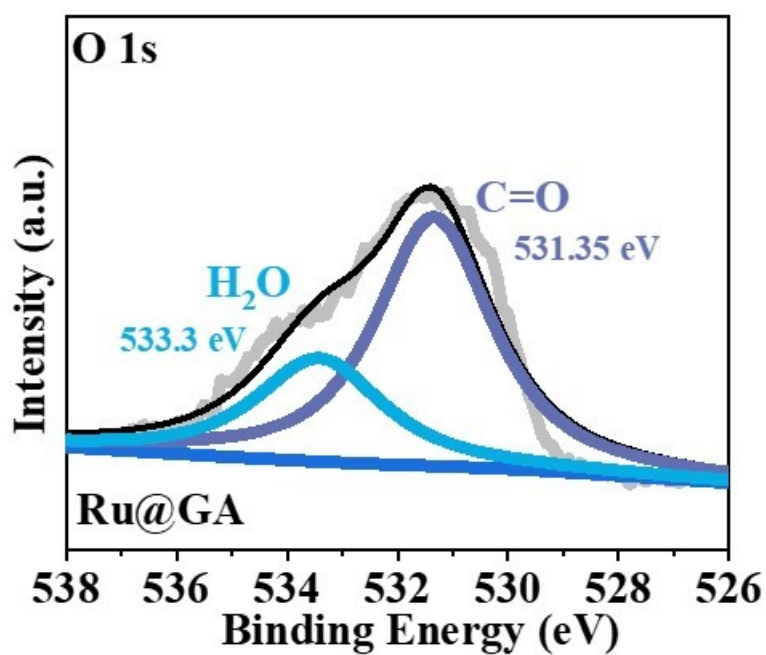

**Fig. S13.** O 1s XPS of Ru@GA.



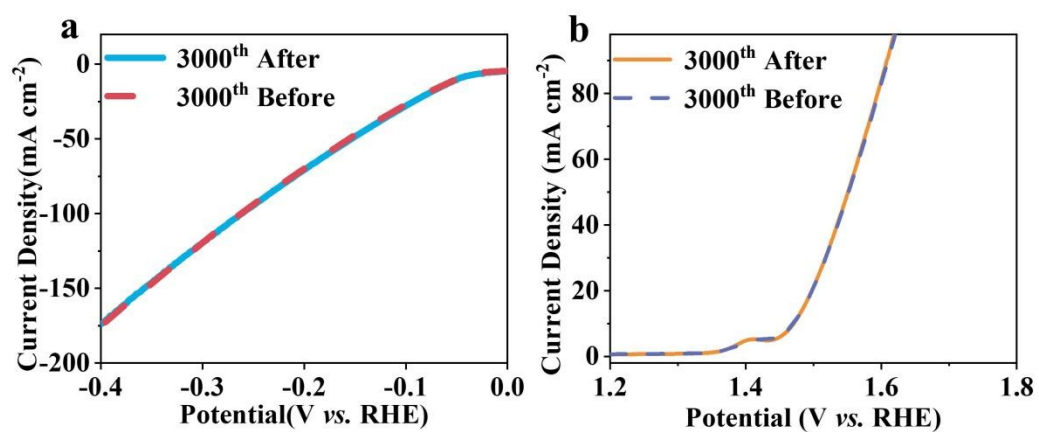

**Fig. S14.** Polarization curves before and after 3000 cycles of (a) HER; (b) OER.

**Table S1.** Impedance parameter values obtained by fitting the Nyquist curve of the equivalent circuit in HER

| Samples                 | $R_1$ | $R_s$ | $R_{ct}$ |
|-------------------------|-------|-------|----------|
| Ru@GA                   | 0.677 | 2.93  | 17.08    |
| Ru/NiO <sub>x</sub> @GA | 0.680 | 2.458 | 4.554    |
| Ru/Ni@GA-H              | 0.857 | 3.652 | 23.54    |

|      |      |       |       |
|------|------|-------|-------|
| Pt/C | 0.72 | 2.286 | 5.112 |
|------|------|-------|-------|

**Table S2.** Impedance parameter values obtained by fitting the Nyquist curve of the equivalent circuit in OER

| Samples                 | $R_1$ | $R_s$ | $R_{ct}$ |
|-------------------------|-------|-------|----------|
| Ru@GA                   | 0.89  | 2.122 | 15.24    |
| Ru/NiO <sub>x</sub> @GA | 0.708 | 2.547 | 6.459    |
| Ru/Ni@GA-H              | 0.945 | 2.864 | 132.72   |
| RuO <sub>2</sub>        | 0.787 | 2.862 | 117.85   |



**Table S3.** Comparison of the HER performance of our work with various related electrocatalysts at a current density of 10 mA cm<sup>-2</sup>.

| Catalyst                             | $\eta_{-10}$ mA<br>cm <sup>-2</sup> (mV) | Tafel slope<br>(mV dec <sup>-1</sup> ) | Reference |
|--------------------------------------|------------------------------------------|----------------------------------------|-----------|
| CNT-V-Fe-Ru                          | 64                                       | 51                                     | 1         |
| Ru <sub>n</sub> -Ru <sub>s</sub> -NC | 37                                       | 48                                     | 2         |
|                                      |                                          |                                        | 3         |
| M-Co@Ru/NC                           | 34                                       | 55                                     | 4         |
|                                      |                                          |                                        | 5         |
| NiO/Ru@Ni                            | 39                                       | 75                                     | 6         |
|                                      |                                          |                                        | 7         |
| CoRu@NC                              | 45                                       | 66                                     | 8         |
|                                      |                                          |                                        |           |
| RuP <sub>2</sub> @NPC                | 52                                       | 69                                     |           |
|                                      |                                          |                                        |           |
| Ru@B,N-CNTs                          | 54                                       | 90                                     | This work |
| Ni <sub>3</sub> N/Ru/NCAC            | 42                                       | 59                                     |           |
|                                      |                                          |                                        |           |
| Ru/NiO <sub>x</sub> @GA              | 32                                       | 47.26                                  |           |

**Table S4.** Comparison of the OER performance of our work with various related electrocatalysts at a current density of 10 mA cm<sup>-2</sup>.

| Catalyst                                         | $\eta_{10}$ mA cm <sup>-2</sup> (mV) | Tafel slope (mV dec <sup>-1</sup> ) | Reference |
|--------------------------------------------------|--------------------------------------|-------------------------------------|-----------|
| Ru/Co–N–C-800 °C                                 | 276                                  | 65.7                                | 9         |
| CoFeP@Ru                                         | 340                                  | 58                                  | 10        |
|                                                  |                                      |                                     | 7         |
| Ru@B,N-CNTs                                      | 315                                  | 61.5                                | 11        |
| Ru-FeRu@C/NC                                     | 345                                  | 64.7                                | 12        |
| CoNG/Ru                                          | 350                                  | 82.3                                | 13        |
|                                                  |                                      |                                     | 14        |
| RuO <sub>2</sub> /Co <sub>3</sub> O <sub>4</sub> | 305                                  | 69                                  | 15        |
| rGO/Ni <sub>2</sub> P                            | 283                                  | 43.6                                | 16        |
| Ru-Co <sub>2</sub> P@Ru-N-C                      | 280                                  | 61                                  | This work |
| CoP/Ti <sub>3</sub> C <sub>2</sub> MXene         | 280                                  | 95.4                                |           |
| Ru/NiO <sub>x</sub> @GA                          | 237                                  | 25.3                                |           |

**Table S5.** Comparison of Total Water Decomposition Performance of our work with Various Relevant Electrocatalysts at a Current Density of 10 mA cm<sup>-2</sup>.

| Catalyst                                                   | $\eta_{10}$ mA cm <sup>-2</sup> (V) | Reference |
|------------------------------------------------------------|-------------------------------------|-----------|
| NiFeRu-LDH/NF                                              | 1.52                                | 17        |
| Ru <sub>1</sub> Co <sub>y</sub> NPs                        | 1.59                                | 18        |
| RuCoP@CN                                                   | 1.60                                | 19        |
|                                                            |                                     | 7         |
| Ru@B,N-CNTs                                                | 1.570                               | 11        |
| Ru-FeRu@C/NC                                               | 1.630                               | 12        |
|                                                            |                                     | 20        |
| CoNG/Ru                                                    | 1.580                               | 21        |
| e-Ni <sub>0.6</sub> Ru <sub>0.4</sub> @C                   | 1.520                               | This work |
| RuO <sub>2</sub> -Fe <sub>2</sub> O <sub>3</sub> /HrGO NSs | 1.860                               |           |
| Ru/NiO <sub>x</sub> @GA                                    | 1.53                                |           |

**Table S6.** ICP results of Ru/NiO<sub>x</sub>@GA

| Sample Number           | test element | Co (mg/L) | C1 (mg/L) | Ru content (%) |
|-------------------------|--------------|-----------|-----------|----------------|
| Ru/NiO <sub>x</sub> @GA | Ru           | 0.023     | 0.023     | 12             |
|                         |              | 0.025     | 0.025     |                |
|                         |              | 0.025     | 0.025     |                |

**Table S7.** The release of Ru to the solution after water splitting

| Sample Number                  | test element | C <sub>o</sub> (μg/L) | C <sub>1</sub> (μg/L) |
|--------------------------------|--------------|-----------------------|-----------------------|
| solution after water splitting | Ru           | 0.054                 | 0.541                 |
|                                |              | 0.058                 | 0.581                 |
|                                |              | 0.054                 | 0.546                 |

## References

- [1] T. Gao, X. Tang, X. Li, S. Wu, S. Yu, P. Li, D. Xiao, Z. Jin, Understanding the Atomic and Defective Interface Effect on Ruthenium Clusters for the Hydrogen Evolution Reaction. *Acs Catal* 2023, 13 (1), 49-59.
- [2] C. Yang, Z. Wu, Z. Zhao, Y. Gao, T. Ma, C. He, C. Wu, X. Liu, X. Luo, S. Li, C. Cheng, C. Zhao, Electronic Structure-Dependent Water-Dissociation Pathways of Ruthenium-Based Catalysts in Alkaline H-Evolution. *Small* 2023, 19 (14), 2206949.
- [3] H. Zhang, H. Su, M. Soldatov, Y. Li, X. Zhao, M. Liu, W. Zhou, X. Zhang, X. Sun, Y. Xu, P. Yao, S. Wei, Q. Liu, Dynamic Co-Ru Bond Shrinkage at Atomically Dispersed Ru Sites for Alkaline Hydrogen Evolution Reaction. *Small* 2021, 17 (49), 2105231.
- [4] C. Zhong, Q. Zhou, S. Li, L. Cao, J. Li, Z. Shen, H. Ma, J. Liu, M. Lu, H. Zhang, Enhanced synergistic catalysis by a novel triple-phase interface design of NiO/Ru@Ni for the hydrogen evolution reaction. *J Mater Chem A* 2019, 7 (5), 2344-2350.
- [5] Y. Xu, Y. Li, S. Yin, H. Yu, H. Xue, X. Li, H. Wang, L. Wang, Ultrathin nitrogen-doped graphitized carbon shell encapsulating CoRu bimetallic nanoparticles for enhanced electrocatalytic hydrogen evolution. *Nanotechnology* 2018, 29 (22), 225403.

- [6] Z. Pu, I. Amiin, Z. Kou, W. Li, S. Mu, RuP<sub>2</sub>-Based Catalysts with Platinum-like Activity and Higher Durability for the Hydrogen Evolution Reaction at All pH Values. 2017, 56 (38), 11559-11564.
- [7] M. Fan, X. Chen, M. Zhang, L. Cui, X. He, X. Zou, Highly dispersed Ru nanoclusters anchored on B,N co-doped carbon nanotubes for water splitting. *Inorg Chem Front* 2022, 9 (5), 968-976.
- [8] X. Zhao, X. Yong, Q. Ji, Z. Yang, Y. Song, Y. Sun, Z. Cai, J. Xu, L. Li, S. Shi, F. Chen, C. Li, P. Wang, J. Baek, Controlled synthesis of highly active bifunctional electrocatalysts for overall water splitting using coal-based activated carbons. *J Mater Chem A* 2023, 11 (24), 12726-12734.
- [9] C. Rong, X. Shen, Y. Wang, L. Thomsen, T. Zhao, Y. Li, X. Lu, R. Amal, C. Zhao, Electronic Structure Engineering of Single-Atom Ru Sites via Co-N<sub>4</sub> Sites for Bifunctional pH-Universal Water Splitting. *Advanced Materials* 2022, 34 (21), 2110103.
- [10] S. Liu, X. Mu, P. Ji, Y. Lv, L. Wang, Q. Zhou, C. Y. Chen, S. Mu, Constructing a Rod-like CoFeP@Ru Heterostructure with Additive Active Sites for Water Splitting. *Chemcatchem* 2020, 12 (20), 5149-5155.
- [11] W. Feng, Y. Feng, J. Chen, H. Wang, Y. Hu, T. Luo, C. Yuan, L. Cao, L. Feng, J. Huang, Interfacial electronic engineering of Ru/FeRu nanoparticles as efficient trifunctional electrocatalyst for overall water splitting and Zn-air battery. *Chem Eng J* 2022, 437.
- [12] T. He, Y. Peng, Q. Jia, J. Lu, Q. Liu, R. Mercado, Y. Chen, F. Nichols, Y. Zhang, S. Chen, Nanocomposites Based on Ruthenium Nanoparticles Supported on Cobalt and Nitrogen-Codoped Graphene Nanosheets as Bifunctional Catalysts for Electrochemical Water Splitting. *Acs Appl Mater Inter* 2019, 11 (50), 46912-46919.
- [13] H. Liu, G. Xia, R. Zhang, P. Jiang, J. Chen, Q. Chen, MOF-derived RuO/CoO heterojunctions as highly efficient bifunctional electrocatalysts for HER and OER in alkaline solutions. *Rsc Adv* 2017, 7 (7), 3686-3694.
- [14] P. Li, R. Chen, S. Tian, Y. Xiong, Efficient Oxygen Evolution Catalysis Triggered by Nickel Phosphide Nanoparticles Compositing with Reduced Graphene Oxide with Controlled Architecture. *Acs Sustain Chem Eng* 2019, 7 (10), 9566-9573.
- [15] P. Wang, K. Wang, Y. Liu, H. Li, Y. Guo, Y. Tian, S. Guo, M. Luo, Y. He, Z. Liu, S. Guo, Dual-Type Ru Atomic Sites for Efficient Alkaline Overall Water Splitting. *Adv Funct Mater* 2024, 34 (36), 2316709.
- [16] L. Yan, B. Zhang, S. Wu, J. Yu, A general approach to the synthesis of transition metal phosphide nanoarrays on MXene nanosheets for pH-universal hydrogen evolution and alkaline overall water splitting. *J Mater Chem A* 2020, 8 (28), 14234-14242.

- [17]G. Chen, T. Wang, J. Zhang, P. Liu, H. Sun, X. Zhuang, M. Chen, X. Feng, Accelerated Hydrogen Evolution Kinetics on NiFe-Layered Double Hydroxide Electrocatalysts by Tailoring Water Dissociation Active Sites. *Advanced Materials* 2018, 30 (10), 1706279.
- [18]Y. Bao, J. Dai, J. Zhao, Y. Wu, C. Li, L. Ji, X. Zhang, F. Yang, Modulation in Ruthenium-Cobalt Electronic Structure for Highly Efficient Overall Water Splitting. *Acs Appl Energ Mater* 2020, 3 (2), 1869-1874.
- [19]B. Yang, Y. Du, M. Shao, D. Bin, Q. Zhao, Y. Xu, B. Liu, H. Lu, MOF-derived RuCoP nanoparticles-embedded nitrogen-doped polyhedron carbon composite for enhanced water splitting in alkaline media. *Journal of Colloid and Interface Science* 2022, 616, 803-812.
- [20]Q. Yang, P. Jin, B. Liu, L. Zhao, J. Cai, Z. Wei, S. Zuo, J. Zhang, L. Feng, Ultrafine carbon encapsulated NiRu alloys as bifunctional electrocatalysts for boosting overall water splitting: morphological and electronic modulation through minor Ru alloying. *J Mater Chem A* 2020, 8 (18), 9049-9057.
- [21]H. Mosallaei, H. Hadadzadeh, A. Ensafi, K. Mousaabadi, M. Weil, A. Foelske, M. Sauer, Evaluation of HER and OER electrocatalytic activity over RuO-FeO nanocomposite deposited on HrGO nanosheets. *International Journal of Hydrogen Energy* 2023, 48 (5), 1813-1830.
